# Supplementary material
Source: PubMed Central journal article supplement (PMC7741180)
Supplement: aim-olf-M205926-M20-5926_Supplement.pdf [file aim-olf-M205926-M20-5926_Supplement.pdf]

## Supplementary Material\*

Nehme M, Braillard O, Alcoba G, et al. COVID-19 symptoms: longitudinal evolution and persistence in outpatient settings. *Ann Intern Med.* 8 December 2020. [Epub ahead of print]. doi:10.7326/M20-5926

### *Supplement.* **Survey Data Collected**

\* This supplementary material was provided by the authors to give readers further details on their article. The material was reviewed but not copyedited.

**Supplement. Survey data collected**

|                                                         |                                                                                                                                                                                                  |
|---------------------------------------------------------|--------------------------------------------------------------------------------------------------------------------------------------------------------------------------------------------------|
| Record ID                                               |                                                                                                                                                                                                  |
| Date                                                    |                                                                                                                                                                                                  |
| Unreachable                                             | Yes/No                                                                                                                                                                                           |
| Date of test                                            |                                                                                                                                                                                                  |
| Testing center                                          |                                                                                                                                                                                                  |
| Hospitalization                                         | Yes/No                                                                                                                                                                                           |
| Date of hospitalization                                 |                                                                                                                                                                                                  |
| Date of symptoms onset                                  |                                                                                                                                                                                                  |
| Risk factors (Yes/No, multiple options possible)        | Cardiovascular disease<br>Hypertension<br>Diabetes<br>Chronic respiratory disease<br>Cancer<br>Immunosuppression<br>Other chronic disease<br>Pregnancy                                           |
| Symptoms (Yes/No, multiple options possible)            | Cough<br>Dyspnea<br>Fever (T >38C)<br>Fatigue<br>Myalgias, arthralgias<br>Headache<br>Rhinorrhea<br>Odynodysphagia<br>Anosmia/agueusia<br>Abdominal pain<br>Nausea/vomiting<br>Diarrhea<br>Other |
| Deteriorating clinical symptom                          | Yes/No                                                                                                                                                                                           |
| Orientation (only one option possible)                  | Follow-up every 2 days<br>Follow-up every day<br>End of follow-up                                                                                                                                |
| Reason for end of follow-up (multiple options possible) | Followed by primary care<br>Physician<br>Patient's wish<br>Death<br>Out of canton<br>Clinical recovery<br>Lost to follow-up (unreachable for 2 consecutive days)                                 |
| <b>D30-45 assessment</b>                                |                                                                                                                                                                                                  |
| Date of assessment                                      |                                                                                                                                                                                                  |
| Unreachable                                             |                                                                                                                                                                                                  |
| Hospitalization                                         | Not hospitalized<br>Hospitalized for COVID-related reasons<br>Hospitalized for non-COVID-related reasons                                                                                         |
| Current symptoms                                        | Yes/No                                                                                                                                                                                           |
| List symptoms (Yes/No, multiple options possible)       | Fatigue<br>Loss of appetite<br>Myalgias                                                                                                                                                          |

|                                                 |                                                                                                                                                                                                                                                                       |
|-------------------------------------------------|-----------------------------------------------------------------------------------------------------------------------------------------------------------------------------------------------------------------------------------------------------------------------|
|                                                 | Arthralgias<br>Back pain<br>Fever > 38C<br>Cough<br>Dyspnea<br>Chest pain<br>Palpitations<br>Headache<br>Paresthesias<br>Anosmia<br>Agueusia<br>Odynodysphagia<br>Nausea<br>Vomiting<br>Diarrhea<br>Abdominal pain<br>Rash                                            |
| Current symptom intensity (one option possible) | Mild<br>Moderate<br>Severe                                                                                                                                                                                                                                            |
| Symptom evolution (one option possible)         | Never disappeared<br>Recurred<br>Fluctuates                                                                                                                                                                                                                           |
| Most predominant symptom (one option possible)  | Fatigue<br>Loss of appetite<br>Myalgias<br>Arthralgias<br>Back pain<br>Fever > 38C<br>Cough<br>Dyspnea<br>Chest pain<br>Palpitations<br>Headache<br>Paresthesias<br>Anosmia<br>Agueusia<br>Odynodysphagia<br>Nausea<br>Vomiting<br>Diarrhea<br>Abdominal pain<br>Rash |
| Most worrisome symptom (one option possible)    | Fatigue<br>Loss of appetite<br>Myalgias<br>Arthralgias<br>Back pain<br>Fever > 38C<br>Cough<br>Dyspnea<br>Chest pain<br>Palpitations<br>Headache<br>Paresthesias                                                                                                      |

|                        |                                                                                                                                                                                                                                                                                              |
|------------------------|----------------------------------------------------------------------------------------------------------------------------------------------------------------------------------------------------------------------------------------------------------------------------------------------|
|                        | Anosmia<br>Agueusia<br>Odynodysphagia<br>Nausea<br>Vomiting<br>Diarrhea<br>Abdominal pain<br>Rash                                                                                                                                                                                            |
| If back pain, specify: | Few days<br>Most days<br>All days                                                                                                                                                                                                                                                            |
| If fatigue, specify:   | Normal activity, no limitations in daily activity<br>Limited activity but capable to do light work (office work, cleaning)<br>Limited activity but <50% in bed during the day<br>>50% in bed, but not bedbound<br>Bedbound                                                                   |
| If dyspnea, specify    | Dyspnea only with strenuous exercise<br>Dyspnea when hurrying or walking up a slight hill<br>Has to stop for breath when walking at own pace on flat surface<br>Stops for breath after walking 90 meters or after a few minutes<br>Too breathless to leave house or breathless when dressing |
